# Supplementary material for: Controlled oligomerisation of isoprene-towards the synthesis of squalene analogues
Source: Royal Society of Chemistry journal article supplement (doi:10.1039/c2py20066j), 2012-01-01
Supplement: c2py20066j.pdf [file c2py20066j.pdf]

## Supplementary Information for the submission of the manuscript entitled “Controlled Oligomerisation of Isoprene — Towards the Synthesis of Squalene”

Jianing Li<sup>b</sup>, Jaouad El harfi<sup>a,b</sup>, Steven M. Howdle<sup>b</sup>, Kim Carmichael<sup>c</sup> and  
Derek J. Irvine<sup>a,b\*</sup>

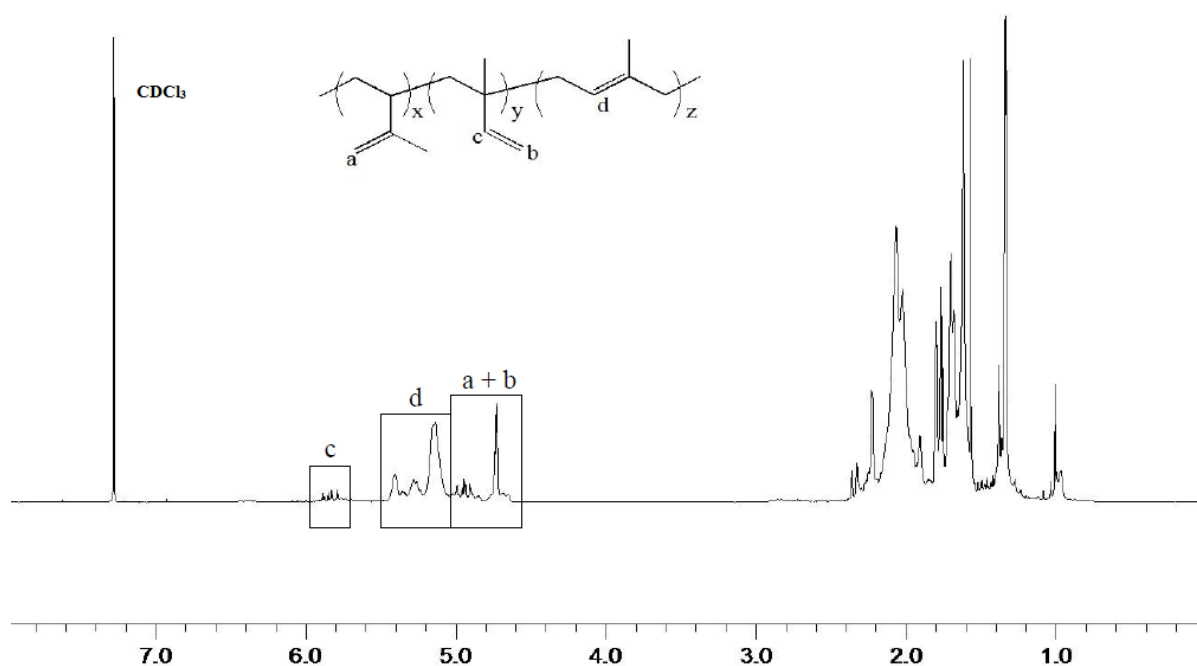

(a) The <sup>1</sup>H NMR spectra of PI oligomers.

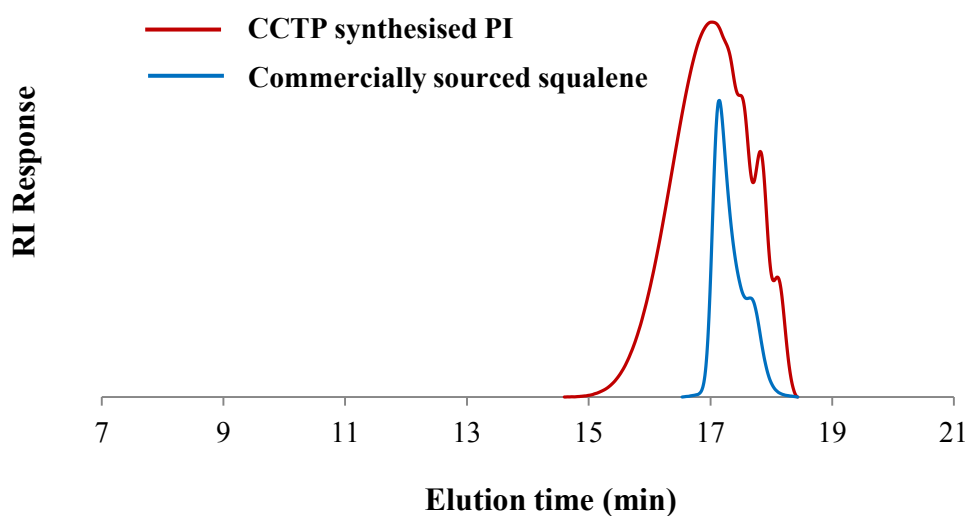

(b) Overlay of GPC traces of commercially sourced squalane CCT polymerisation synthesised PI

(c) All the PI oligomers synthesised in this paper are oil liquid.
